# Supplementary material for: Comparative Analysis of the Disinfection Efficiency of Steel and Polymer Surfaces with Aqueous Solutions of Ozone and Sodium Hypochlorite
Source: MDPI journal article supplement (doi:10.3390/w16050793), 2024-03-06
Supplement: s1 [file s1]

Article

# Comparative Analysis of the Disinfection Efficiency of Steel and Polymer Surfaces with Aqueous Solutions of Ozone and Sodium Hypochlorite

Valentin Romanovski <sup>1,\*</sup>, Andrei Paspelau <sup>2</sup>, Maksim Kamarou <sup>3</sup>, Vitaly Likhavitski <sup>4</sup> and Natalia Korob <sup>3</sup> and Elena Romanovskaia <sup>1</sup>

## Supplementary Materials

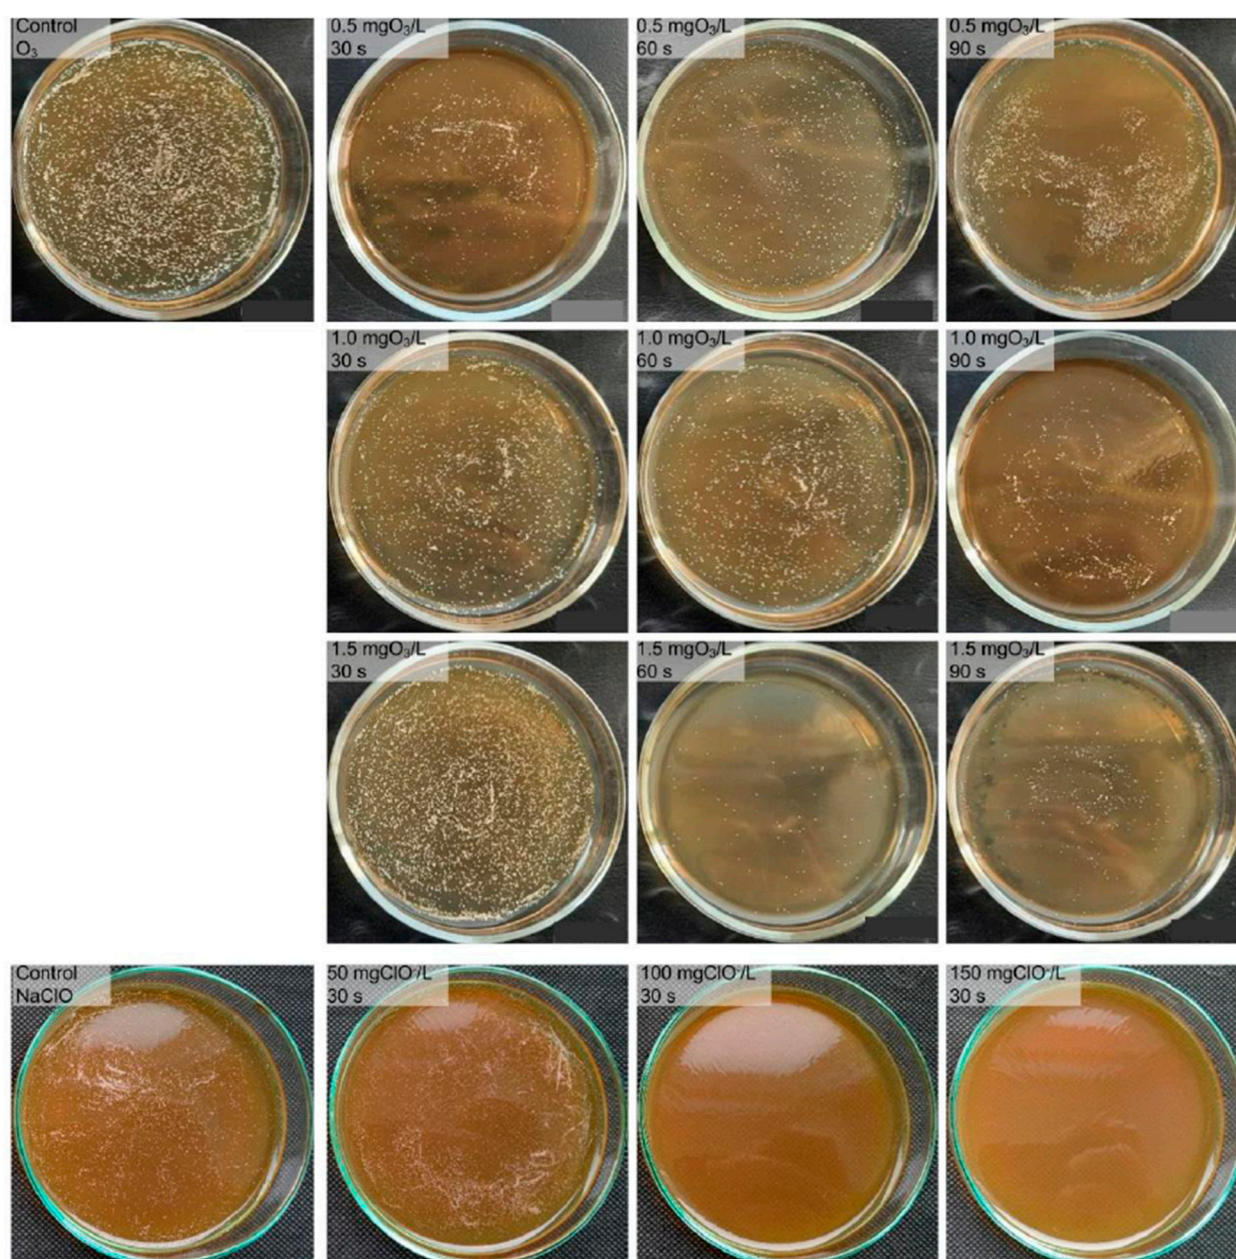

**Figure S1.** Petri dishes after inactivation of *Candida albicans* with an aqueous solution of ozone and sodium hypochlorite, immobilized on metal plates.



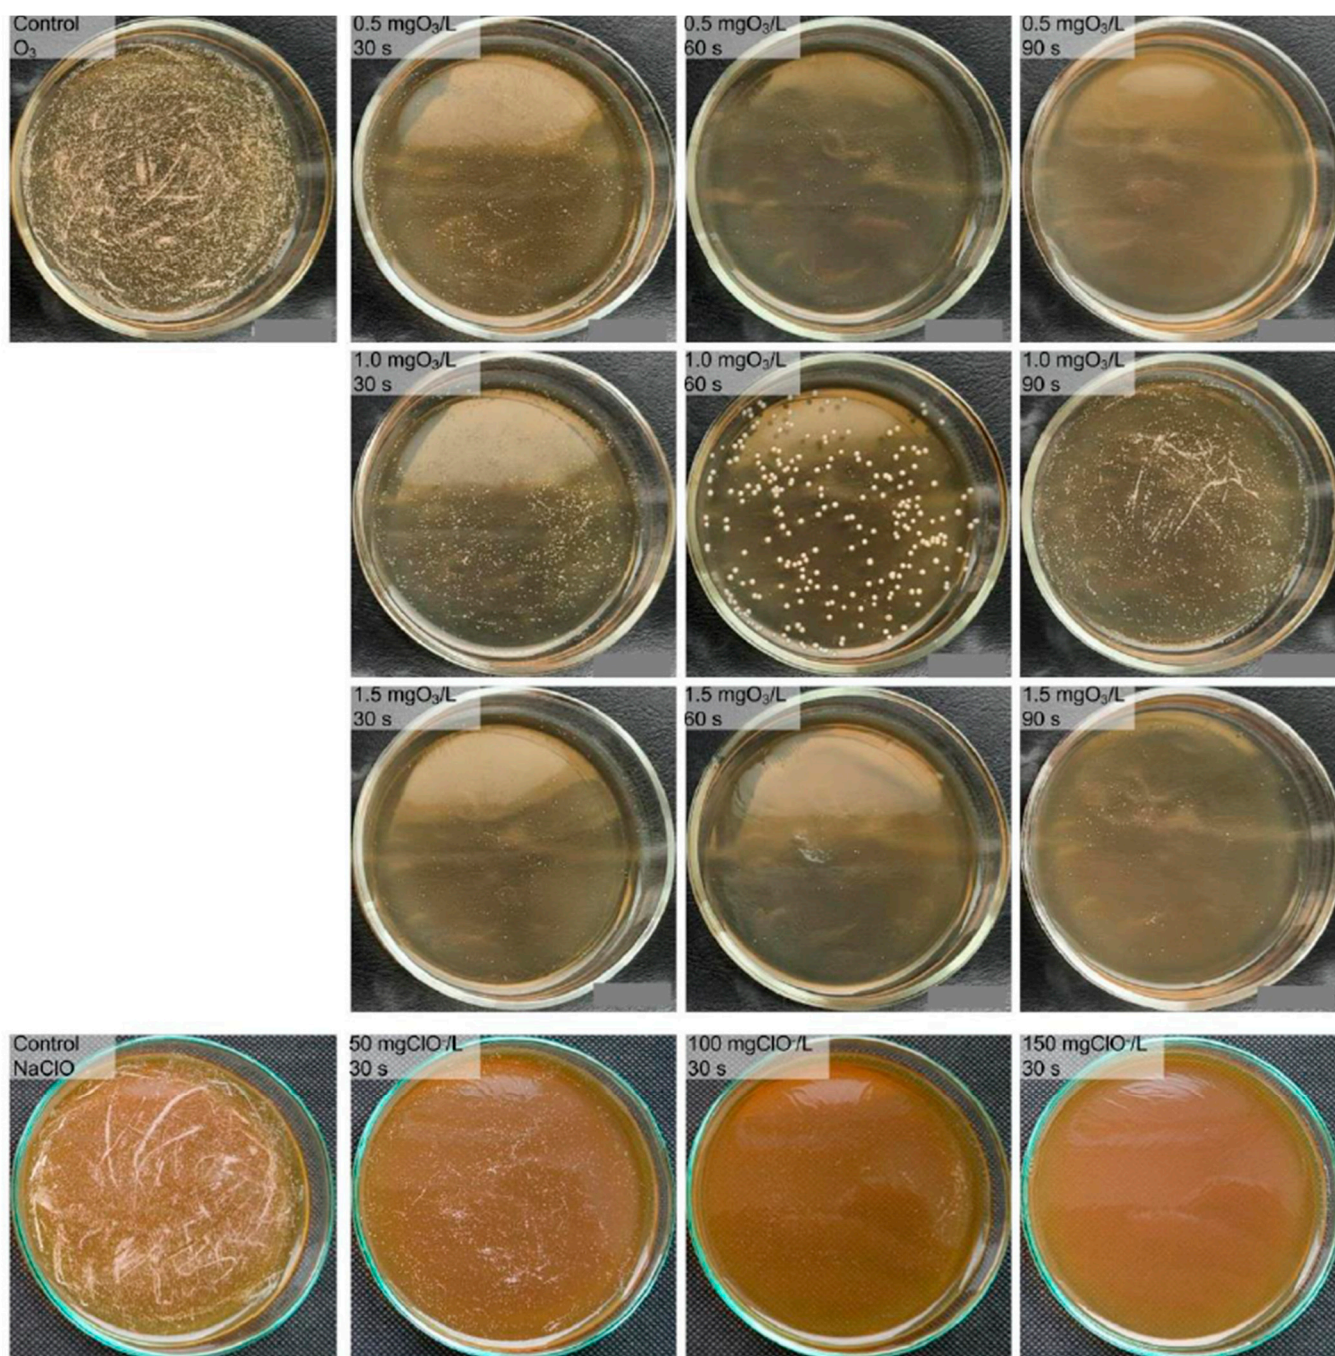

**Figure S2.** Petri dishes after inactivation of *Candida albicans* with an aqueous solution of ozone and sodium hypochlorite, immobilized on polymer plates.

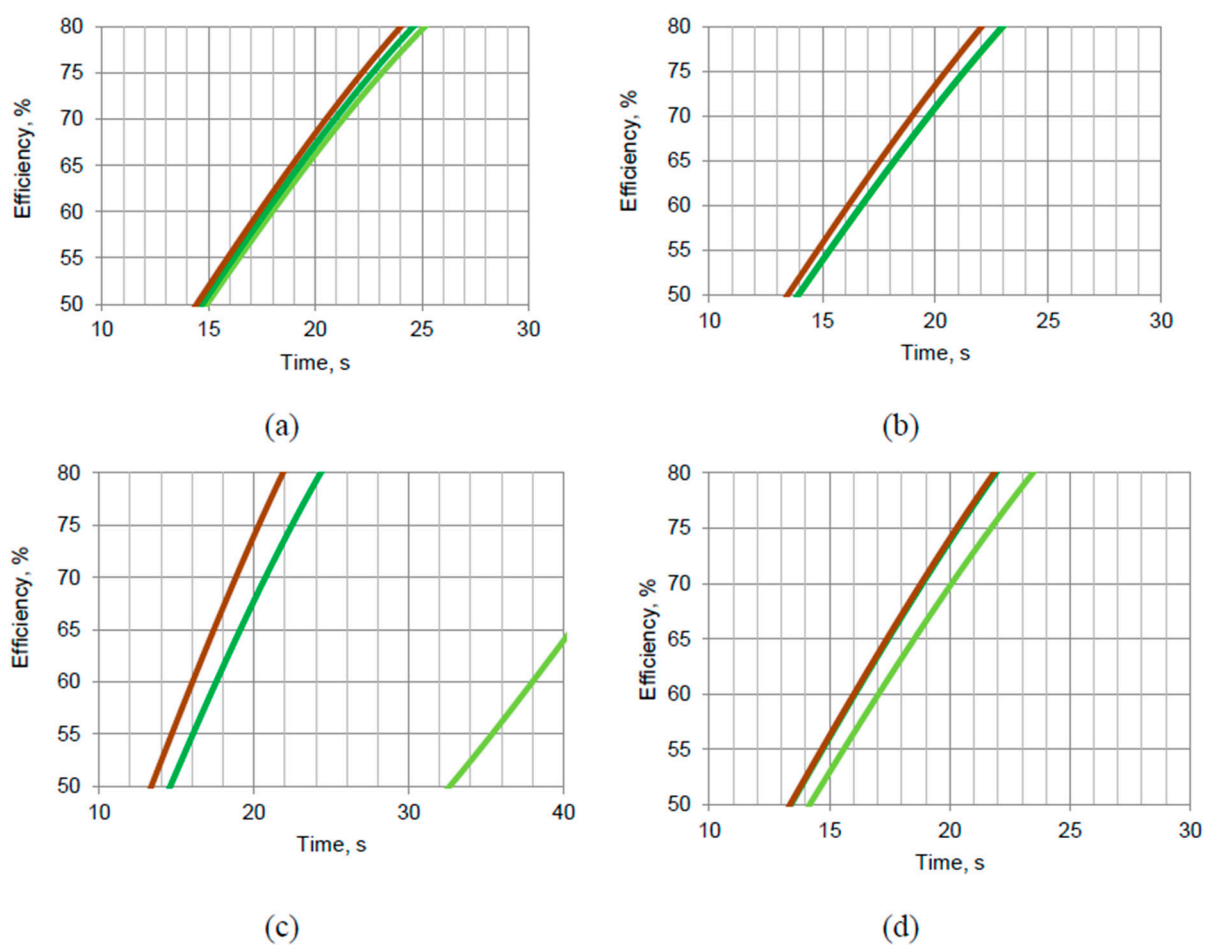

**Figure S3.** Results of inactivation efficiency of *Candida albicans* vs concentration of ozone and sodium hypochlorite in aqueous solution: (a) in  $\text{aqO}_3$  on metal surface; (b) in  $\text{aqO}_3$  on polymer surface; (a) in  $\text{NaClO}$  on metal surface; (b) in  $\text{NaClO}$  on polymer surface.



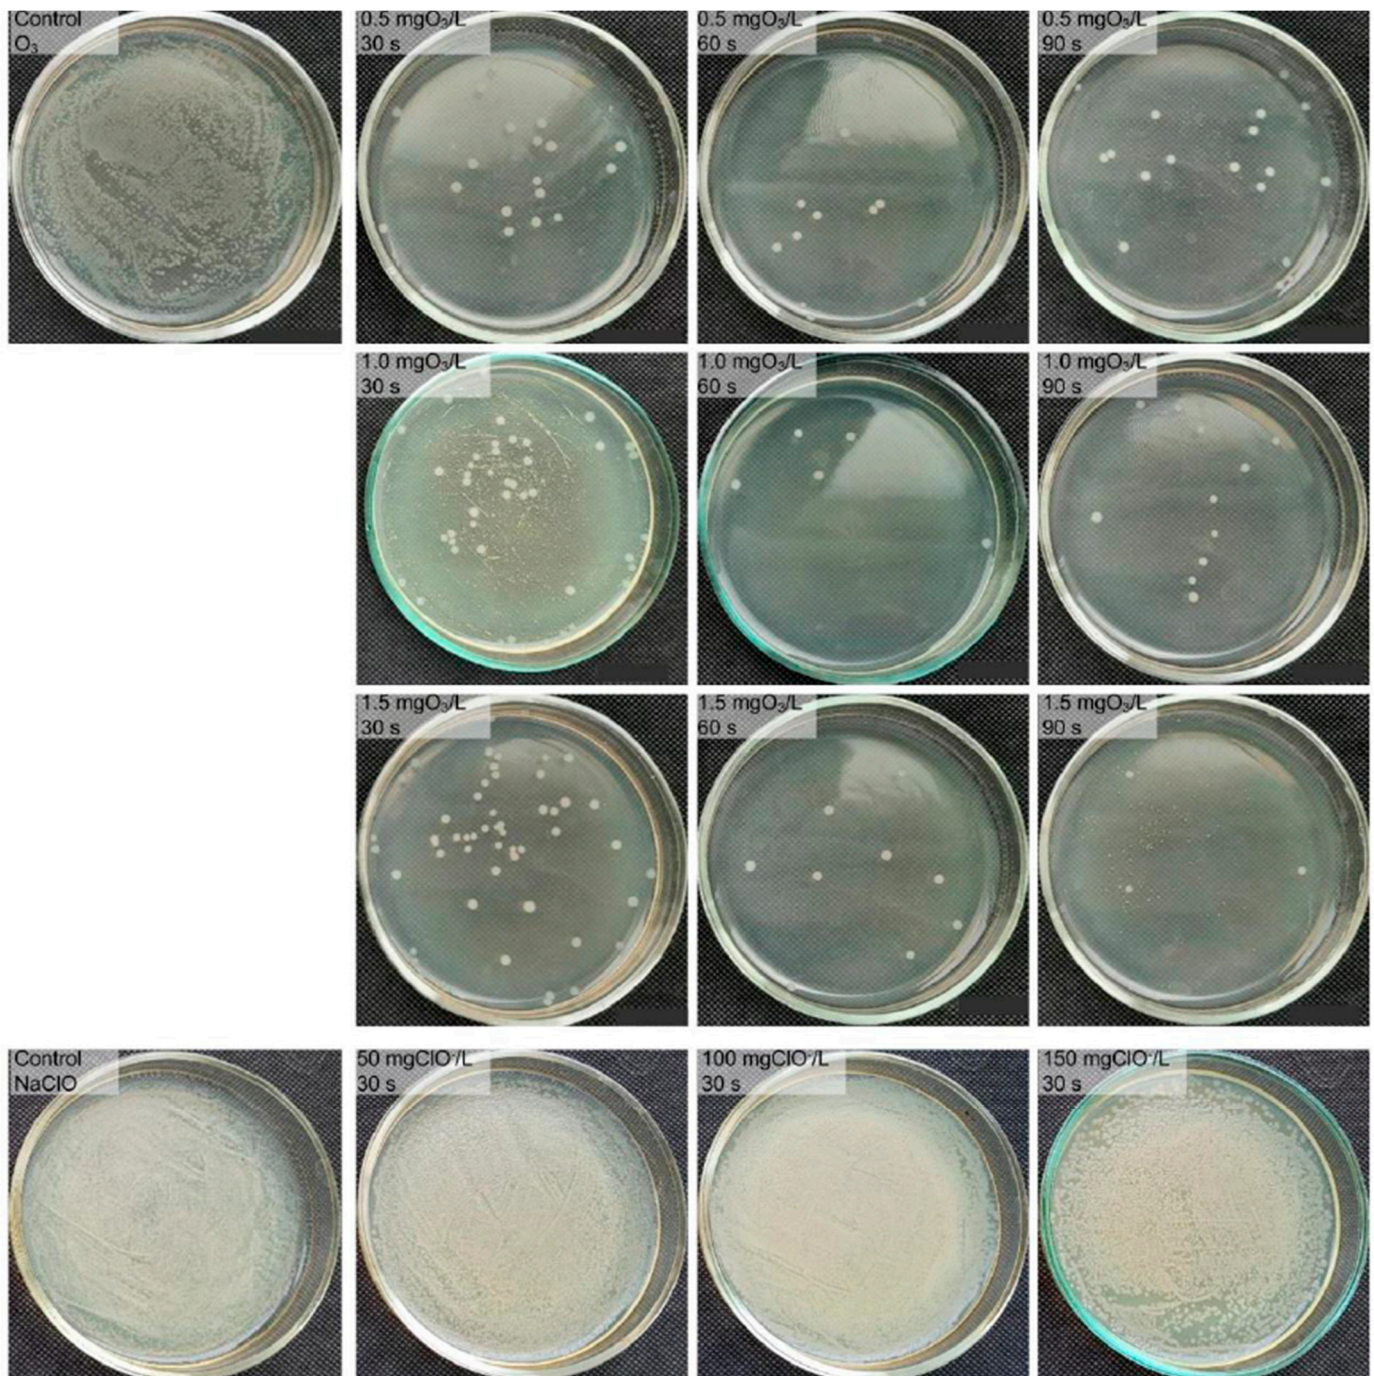

**Figure S4.** Petri dishes after inactivation of *Bacillus subtilis* with an aqueous solution of ozone and sodium hypochlorite, immobilized on metal plates.



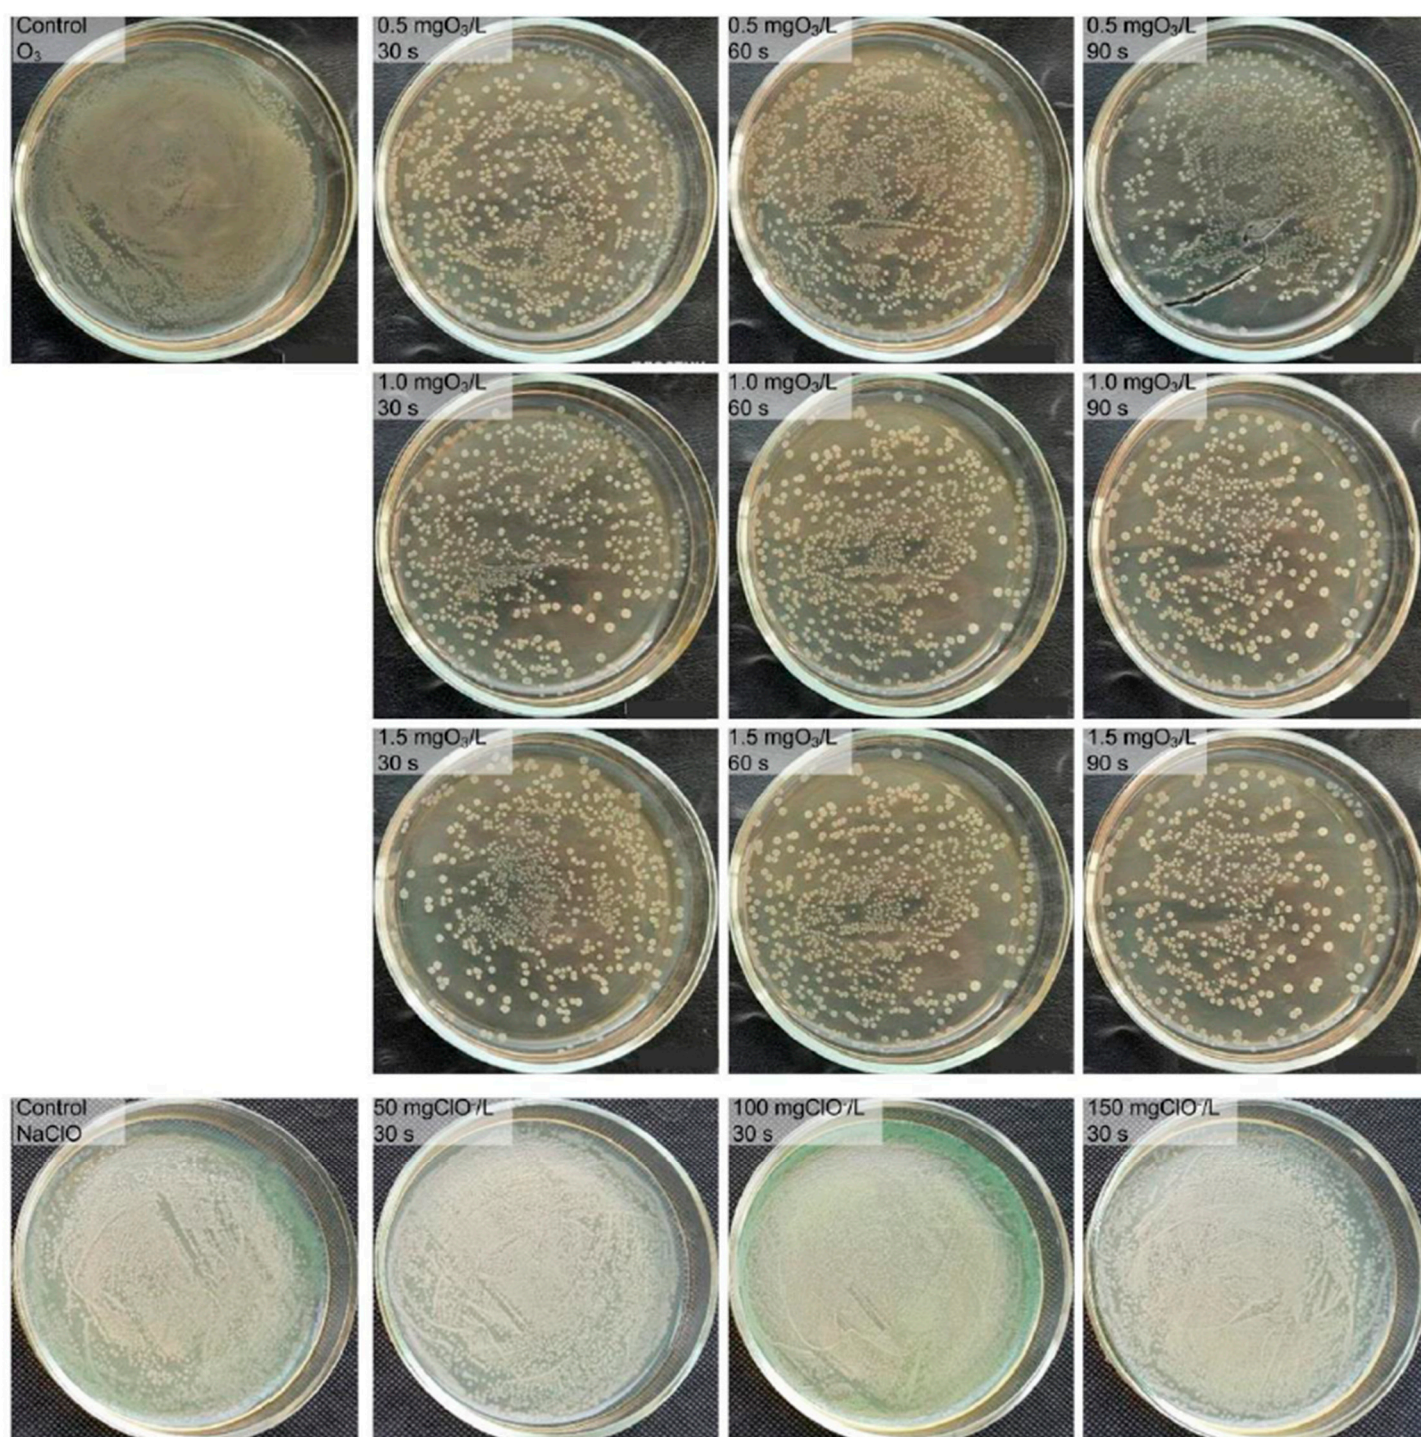

**Figure S5.** Petri dishes after inactivation of *Bacillus subtilis* with an aqueous solution of ozone and sodium hypochlorite, immobilized on polymer plates.

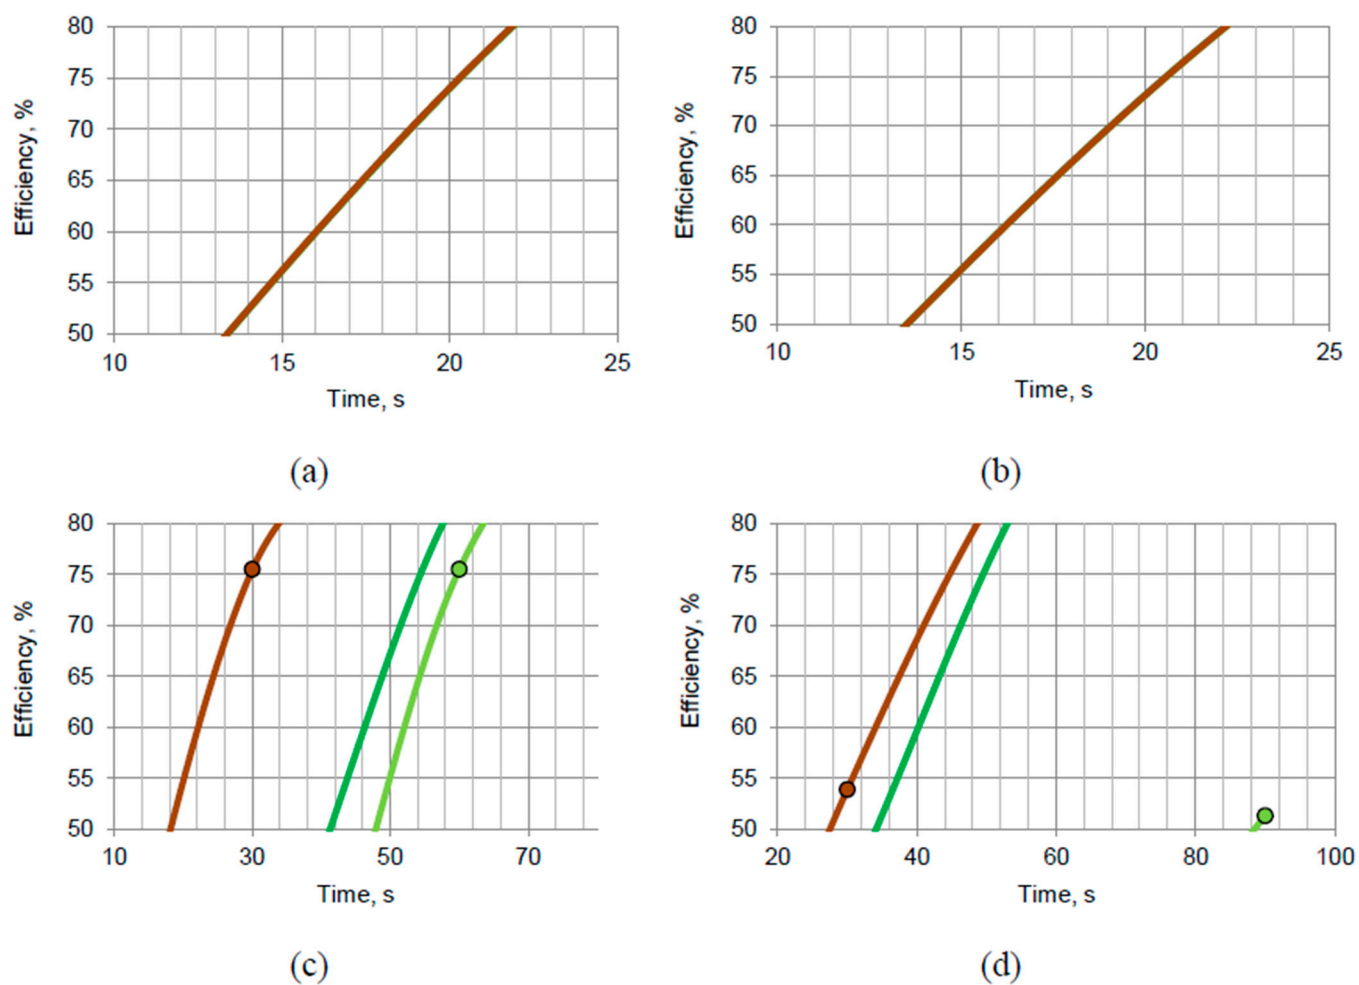

**Figure S6.** Results of inactivation efficiency of *Bacillus subtilis* vs concentration of ozone and sodium hypochlorite in aqueous solution: (a) in  $\text{aqO}_3$  on metal surface; (b) in  $\text{aqO}_3$  on polymer surface; (c) in  $\text{NaClO}$  on metal surface; (d) in  $\text{NaClO}$  on polymer surface



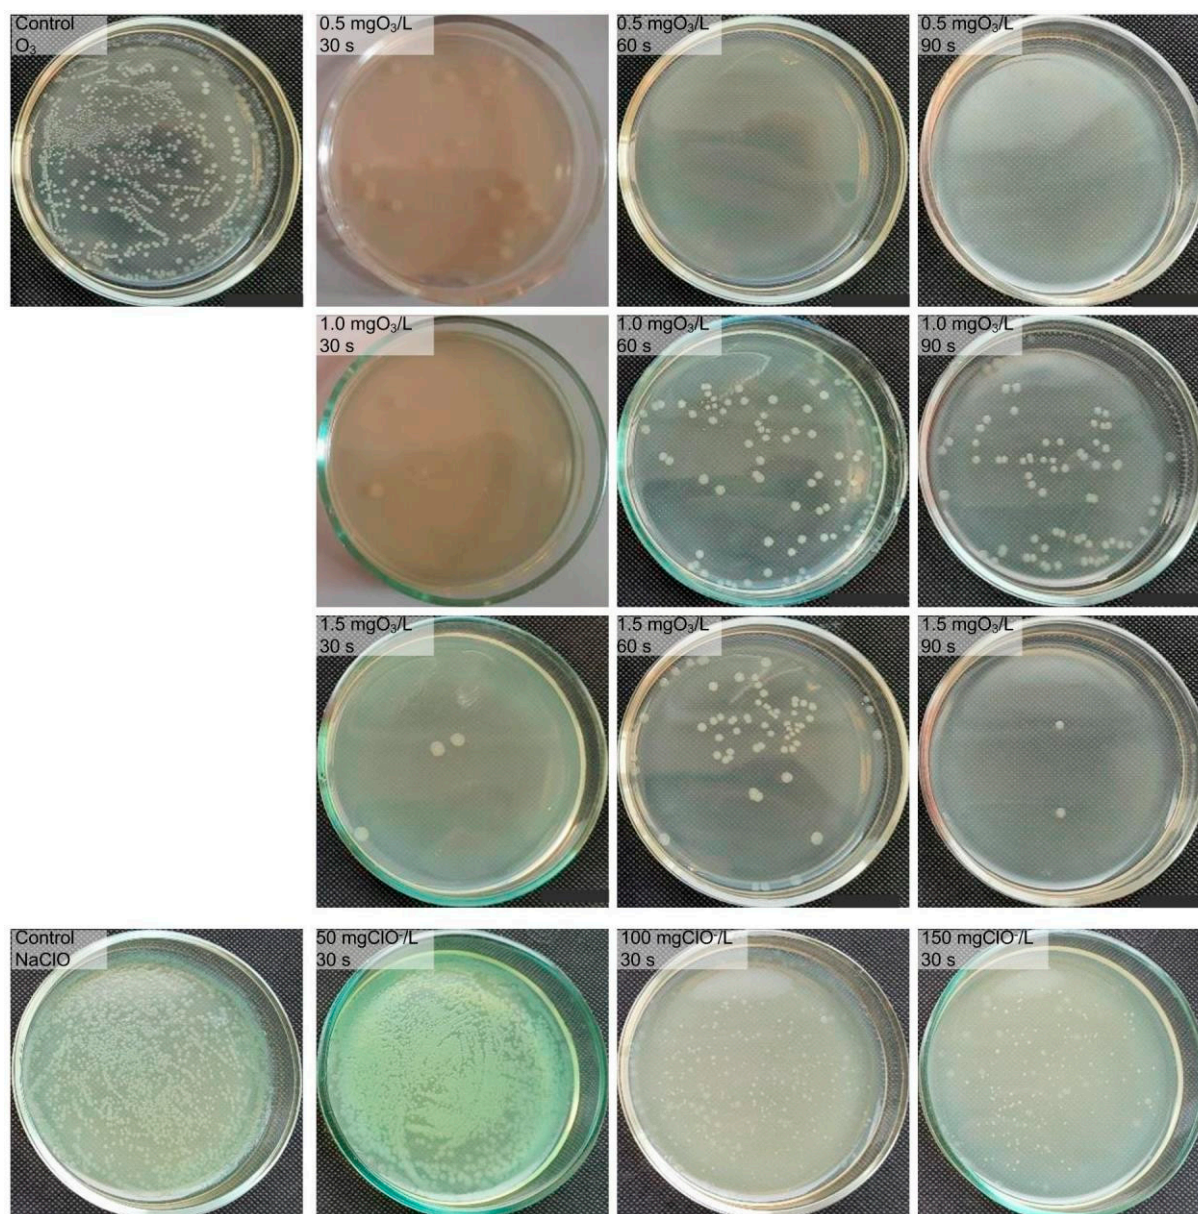

**Figure S7.** Petri dishes after inactivation of *Escherichia coli* with an aqueous solution of ozone and sodium hypochlorite, immobilized on metal plates



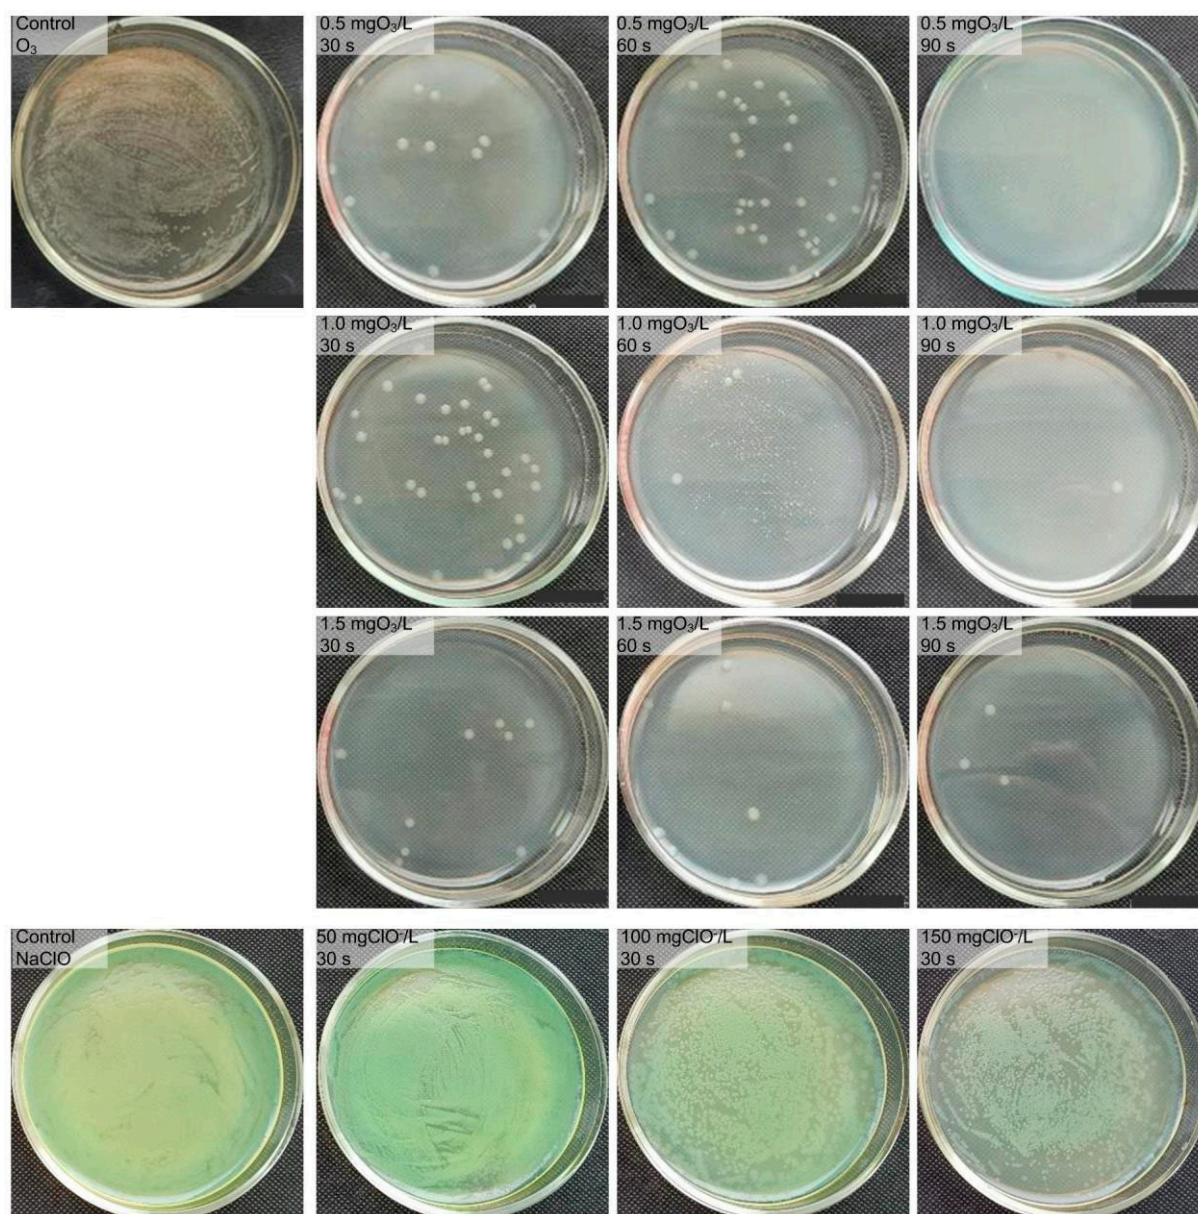

**Figure S8.** Petri dishes after inactivation of *Escherichia coli* with an aqueous solution of ozone and sodium hypochlorite, immobilized on polymer plates



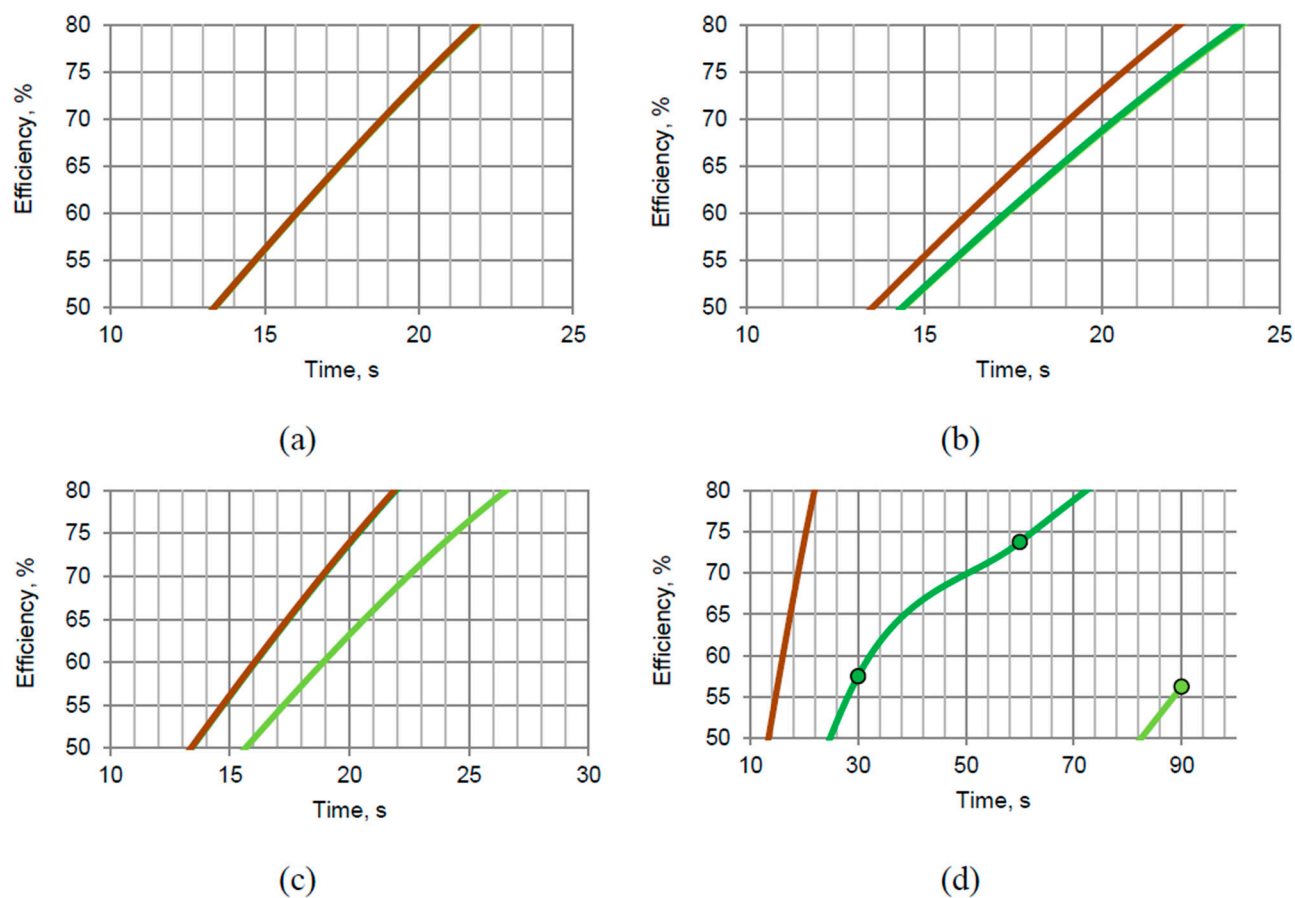

**Figure S9.** Results of inactivation efficiency of *Escherichia coli* vs concentration of ozone and sodium hypochlorite in aqueous solution: (a) in  $\text{aqO}_3$  on metal surface; (b) in  $\text{aqO}_3$  on polymer surface; (a) in  $\text{NaClO}$  on metal surface; (b) in  $\text{NaClO}$  on polymer surface
